# Supplementary material
Source: PubMed Central journal article supplement (PMC7405929)
Supplement: NIHMS1035682-supplement-SI_1.pdf [file NIHMS1035682-supplement-SI_1.pdf]

## Supporting Information

### X-ray crystal structure of the influenza A M2 proton channel S31N mutant in two conformational states: an open and shut case

Jessica L. Thomaston<sup>1\*</sup>, Yibing Wu<sup>1</sup>, Nicholas Polizzi<sup>1</sup>, Lijun Liu<sup>2,3</sup>, Jun Wang<sup>4</sup>, William F. DeGrado<sup>1\*</sup>

<sup>1</sup> Department of Pharmaceutical Chemistry, University of California, San Francisco, CA 94158

<sup>2</sup> State Key Laboratory of Chemical Oncogenomics, Peking University Shenzhen Graduate School, Shenzhen 518055, China

<sup>3</sup> DLX Scientific, Lawrence, KS 66049, USA

<sup>4</sup> Department of Pharmacology and Toxicology, College of Pharmacy, University of Arizona, Tucson, Arizona 85721, United States

\* Authors to whom correspondence should be addressed.

**Table S1.** Data processing and refinement statistics for the X-ray crystal structure of M2(22-46) S31N in two distinct conformational states (PDB code 6MJH).

| <b>Crystal</b>                                | <b>6MJH</b>                 |
|-----------------------------------------------|-----------------------------|
| <b>Space group</b>                            | P 1 21 1                    |
| <b>Cell dimensions</b>                        |                             |
| <b>a, b, c (Å)</b>                            | 36.29 36.15 76.45           |
| <b><math>\alpha, \beta, \gamma</math> (°)</b> | 90 103.6 90                 |
| <b>Data collection</b>                        |                             |
| <b>Wavelength (Å)</b>                         | 1.1159                      |
| <b>Resolution (Å)</b>                         | 37.15 - 2.06 (2.12 - 2.06)  |
| <b>No. reflections</b>                        | 11019 (780)                 |
| <b>Redundancy</b>                             | 5.7 (5.0)                   |
| <b>I/<math>\sigma</math>I</b>                 | 8.0 (2.1)                   |
| <b>Completeness (%)</b>                       | 91.1 (82.6)                 |
| <b>R<sub>pim</sub></b>                        | 0.062 (0.476)               |
| <b>Refinement</b>                             |                             |
| <b>Resolution (Å)</b>                         | 35.24 - 2.06 (2.134 - 2.06) |
| <b>R<sub>work</sub></b>                       | 0.2177 (0.2567)             |
| <b>R<sub>free</sub></b>                       | 0.2517 (0.3176)             |
| <b>Number of non-hydrogen atoms</b>           | 1669                        |
| <b>Protein</b>                                | 1552                        |
| <b>Ligands</b>                                | 37                          |
| <b>Water</b>                                  | 80                          |
| <b>B factors</b>                              | 26.33                       |
| <b>Protein</b>                                | 25.67                       |
| <b>Ligands</b>                                | 36.88                       |
| <b>Solvent</b>                                | 34.12                       |
| <b>RMS deviations</b>                         |                             |
| <b>Bond Lengths (Å)</b>                       | 0.002                       |
| <b>Bond Angles (°)</b>                        | 0.58                        |

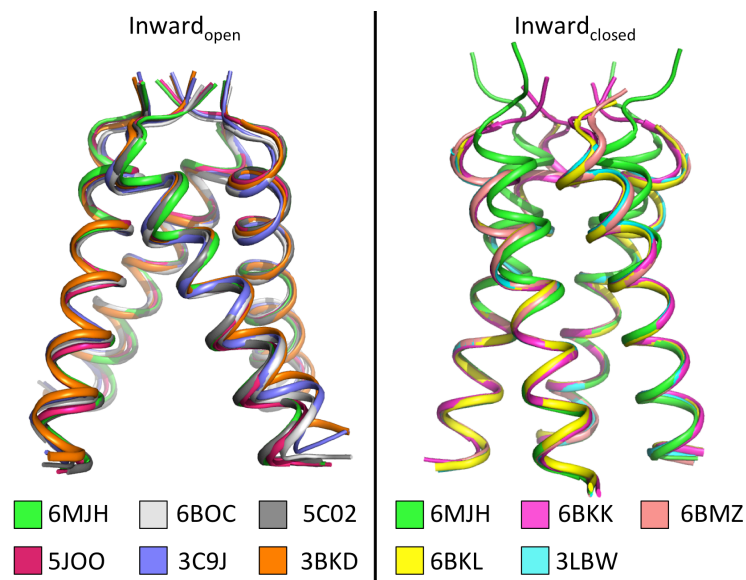

**Figure S1.** Alignment of previously solved X-ray crystal structures to the  $\text{Inward}_{\text{open}}$  conformation (left) and  $\text{Inward}_{\text{closed}}$  conformation (right) of the newly solved crystal structure of M2 S31N in two conformational states (6MJH). In the  $\text{Inward}_{\text{open}}$  conformation there is good agreement between all structures at the N-terminus (residues 22-33), with some variation at the C-terminus (residues 34-46). In the  $\text{Inward}_{\text{closed}}$  conformation there is good agreement among all structures at the channel's C-terminus, whereas the new structure 6MJH is narrower at the N-terminus, which is the binding site of the adamantane drugs.

**Table S2.** Ca RMSD (Å) from alignment of previously solved crystal structures to the  $\text{Inward}_{\text{open}}$  or  $\text{Inward}_{\text{closed}}$  conformation of M2 S31N from structure 6MJH.

| Structure               | 3C9J                                      | 3BKD                         | 5J00                         | 5C02                           | 6BOC                                       |
|-------------------------|-------------------------------------------|------------------------------|------------------------------|--------------------------------|--------------------------------------------|
| Description             | $\text{In}_{\text{open}}$ WT + amantadine | $\text{In}_{\text{open}}$ WT | $\text{In}_{\text{open}}$ WT | $\text{In}_{\text{open}}$ S31N | $\text{In}_{\text{open}}$ WT + rimantadine |
| Ca RMSD                 | 1.348                                     | 1.124                        | 0.441                        | 0.201                          | 1.451                                      |
| Ca RMSD, residues 22-33 | 0.598                                     | 0.569                        | 0.266                        | 0.122                          | 0.675                                      |
| Ca RMSD, residues 34-46 | 1.581                                     | 1.91                         | 0.475                        | 0.194                          | 1.456                                      |

| Structure               | 3LBW                           | 6BKK                                        | 6BKL                                         | 6BMZ                                       |
|-------------------------|--------------------------------|---------------------------------------------|----------------------------------------------|--------------------------------------------|
| Description             | $\text{In}_{\text{closed}}$ WT | $\text{In}_{\text{closed}}$ WT + amantadine | $\text{In}_{\text{closed}}$ WT + rimantadine | $\text{In}_{\text{closed}}$ WT + inhibitor |
| Ca RMSD                 | 0.393                          | 1.263                                       | 1.376                                        | 1.035                                      |
| Ca RMSD, residues 22-33 | 1.687                          | 1.852                                       | 1.842                                        | 1.712                                      |
| Ca RMSD, residues 34-46 | 0.308                          | 0.523                                       | 0.537                                        | 0.264                                      |

**Table S3:** List of PDB accession codes for Inward<sub>closed</sub> Asn31 motif search.

|      |      |      |      |
|------|------|------|------|
| 3w8h | 6f62 | 2j5u | 3qml |
| 1bkr | 5ee7 | 3w8i | 2nxf |
| 2ygz | 3p2c | 5d60 | 2q8n |
| 4c3e | 3ojo | 2bnx | 4cs9 |
| 5ukh | 1wov | 3pnx | 4g22 |
| 4bxj | 4mea | 1bhd | 4xr9 |
| 2gz6 | 3o3m | 5dh0 | 3l0f |
| 2wdq | 3wgd | 1a8h | 5iib |
| 2j1d | 1nc5 | 3gia | 3nx3 |
| 4q1t | 1q0u | 1epx | 3dra |
| 3gyd | 4z4j | 2py6 | 3qkx |
| 3wry | 2qgu | 2d42 | 2x6r |
| 2r85 | 4ysx | 1p6x | 1mz9 |
| 1tff | 5iwz | 3zdo | 2v71 |
| 2q32 | 1yrr | 3lt7 | 5glg |
| 3p8c | 6c12 | 1h6k | 3w4t |
| 1h2v | 5tle | 4htp |      |
| 4uwx | 4jps | 3g79 |      |
| 3pfg | 5ii8 | 4pbh |      |
| 5xhu | 5csd | 4geh |      |

*Analysis of the pH-dependence of the conformational equilibrium of the WT and S31N M2 channel.*

The data from Fig. 5 and 6 were analyzed according to the scheme (S1), which accounts for the two spectroscopically distinct states, identified as  $In_{closed}$  and  $In_{open}$ .

**Scheme S1.** Simultaneous equilibria between the His37 tetrad charge states and the two conformational states,  $In_{closed}$  and  $In_{open}$ .

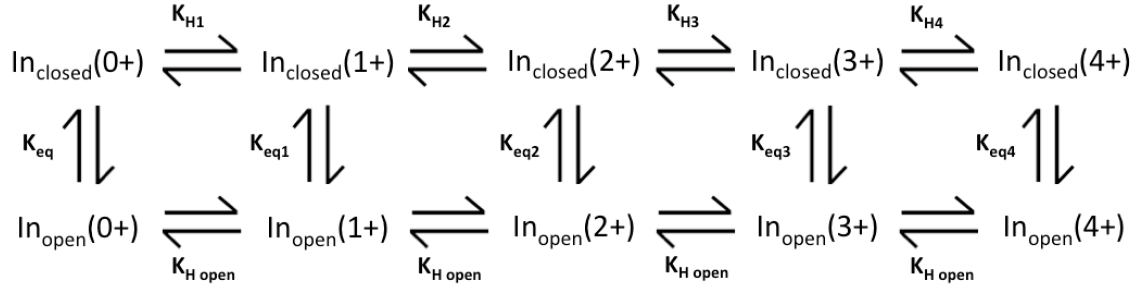

To determine the equilibrium constants that determine the concentration of each species from the pH dependence of the fraction of the protein in the  $In_{closed}$  and  $In_{open}$  states, we express the concentration of the  $In_{closed}$  as,

$$In_{closed} = In_{closed}(0+) + In_{closed}(1+) \dots + In_{closed}(4+) \quad (\text{eq. S1})$$

The concentration of each successively protonated species is then computed based on  $[In_{closed}]$  using the usual protonation equilibria, described below (eq. S3).

and the concentration of  $In_{open}$  as:

$$In_{open} = In_{open}(0+) + In_{open}(1+) \dots + In_{open}(4+) \quad (\text{eq. S2a})$$

in which,

$$In_{open}(0+) = In_{closed}(0+)/K_{eq} \quad (\text{eq. S2b})$$

The phenomenological equilibrium constant ( $\emptyset_{c/o}$ ) conversion of the  $In_{ward_{open}}$  to the  $In_{ward_{closed}}$  form:

$$\emptyset_{c/o} = \frac{K_{eq} \left( 1 + 10^{(pK_{H1} - pH)} + 10^{(pK_{H1} + pK_{H2} - 2 \cdot pH)} + 10^{(pK_{H1} + pK_{H2} + pK_{H3} - 3 \cdot pH)} + 10^{(pK_{H1} + pK_{H2} + pK_{H3} + pK_{H4} - 4 \cdot pH)} \right)}{1 + 10^{(pK_{Hopen} - pH) + \log 4} + 10^{2 \cdot (pK_{Hopen} - pH) + \log 6} + 10^{3 \cdot (pK_{Hopen} - pH) + \log 4} + 10^{4 \cdot (pK_{Hopen} - pH)}}$$

Eq. S3

We use a single pKa for the  $In_{closed}$  state because the His residues are highly hydrated and exposed in this conformation. The fit was insensitive to  $K_{H4}$ , the equilibrium constant for the fourth protonation of the  $In_{ward_{closed}}$  state, so long as its value was less than 4. It was set to 4 to obtain the values shown below. The fits

for parameters from S31N and WT were not significantly different for the individual protonation events, and varied only for the value of Keq. Therefore, these parameters were treated as global parameters, and only Keq was allowed to vary for the two datasets.

**Table S4:** Fitted pKas for WT and S31N based on least-square fitting<sup>1</sup> Scheme S1 to the data in Fig. 5 & 6.

|                                | <b>WT</b> | <b>S31N</b> | <b>Global (shared)</b> |
|--------------------------------|-----------|-------------|------------------------|
| <b>Keq</b>                     | 0.17±0.06 | 0.033±0.012 |                        |
| <b>pK<sub>H1</sub></b>         |           |             | 6.5±1.1                |
| <b>pK<sub>H2</sub></b>         |           |             | 7.4±1.2                |
| <b>pK<sub>H3</sub></b>         |           |             | 4.4±0.8                |
| <b>pK<sub>H4</sub></b>         |           |             | = 4                    |
| <b>pK<sub>Hclosed</sub></b>    |           |             | 5.8±0.1                |
| <b>Goodness of Fit</b>         |           |             |                        |
| <b>R2</b>                      | 0.96      | 0.95        | 0.97                   |
| <b>Absolute Sum of Squares</b> | 0.11      | 0.006       | 0.11                   |
| <b>Constraints</b>             |           |             |                        |
| <b>Keq</b>                     | K0 < 0.5  | K0 < 0.5    |                        |
| <b>pK<sub>H1</sub></b>         |           |             | K1 > 6 and shared      |
| <b>pK<sub>H2</sub></b>         |           |             | K2 < 8 and shared      |
| <b>pK<sub>H3</sub></b>         |           |             | K3 < 6 and shared      |
| <b>pK<sub>H4</sub></b>         |           |             | K4 = 4                 |
| <b>pK<sub>Hclosed</sub></b>    |           |             | K5 is shared           |
| <b>Number of points</b>        |           |             |                        |
| <b># of X values</b>           | 11        | 12          |                        |
| <b># Y values analyzed</b>     | 11        | 12          |                        |

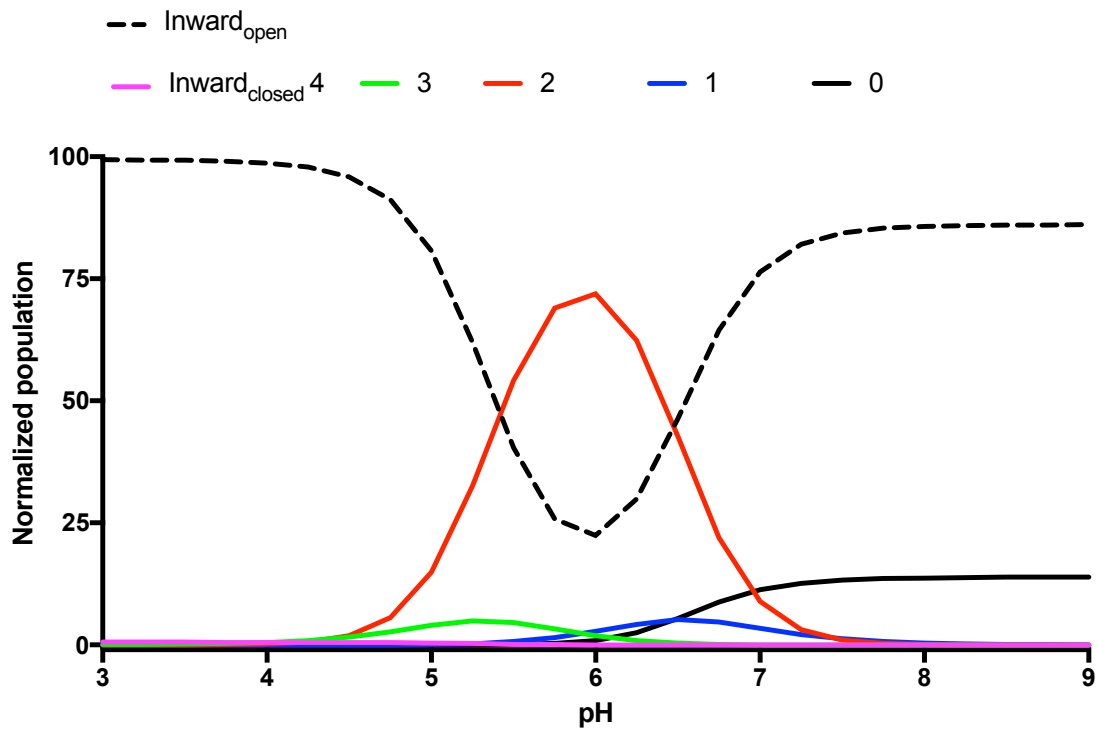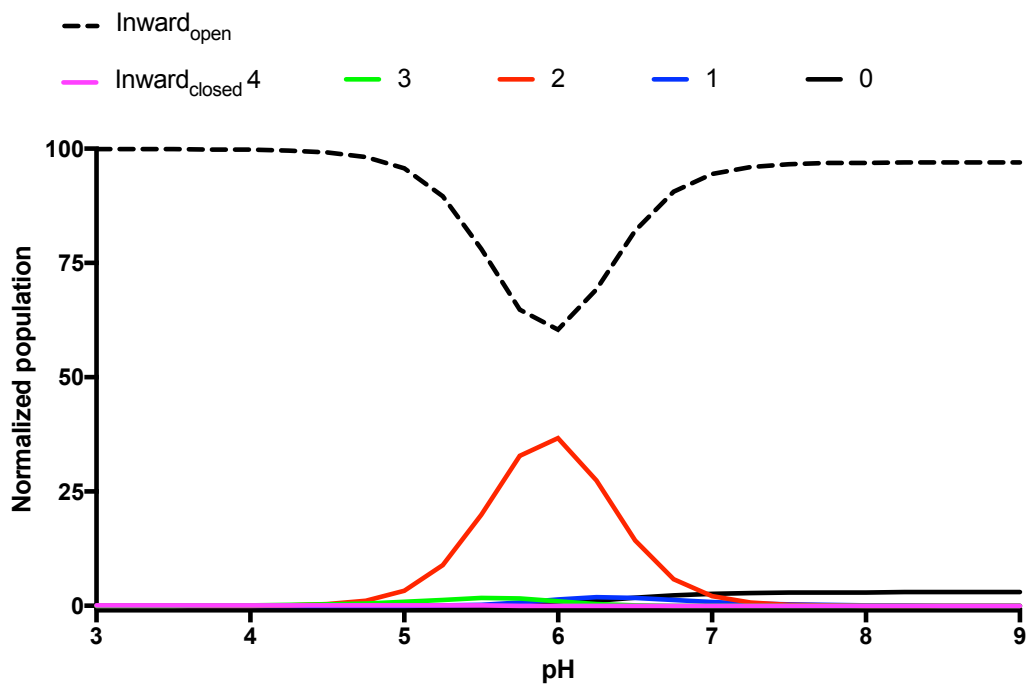

**Figure S2.** Population of the Inward<sub>open</sub> state (dashed line). The fraction of the charged states of the Inward<sub>closed</sub> state (solid lines) for WT (top) and S31N (bottom) are also shown, relative to the total concentration of the protein (i.e., the sum of the [Inward<sub>open</sub>] plus [Inward<sub>closed</sub>] in each possible protonation state).

### Sample preparation, crystallization, and data collection:

Synthesis and purification of M2(22-46) S31N was carried out as previously described.<sup>1,2</sup> The sequence of this construct is as follows:

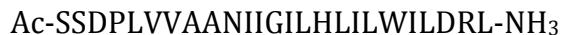

This peptide was reconstituted into the lipid cubic phase (LCP) with some modifications to the protocol described by Caffrey and Cherezov.<sup>3</sup> M2(22-46) peptide dissolved in ethanol was added to dry monoolein (Sigma) and vortexed to mix. The excess ethanol was blown off with N<sub>2</sub> gas, then the mixture was placed under vacuum (< 100 mTorr) overnight to dry. This dried mixture was melted at 40 °C then transferred into a glass syringe using a pipette. Aqueous solution was added at a ratio of 20 µL per 30 mg lipid/peptide sample. In this experiment, MNG-3-C8<sup>4,5</sup> detergent was present in the aqueous phase, as this was shown to stabilize the Inward<sub>closed</sub> conformational state of M2(19-49) in solution NMR experiments. The melted lipid/peptide mix and the aqueous detergent solution were heated to 40 °C and mixed using a metal syringe coupler for approximately 3 minutes to produce the optically transparent lipid cubic phase. High-throughput screening of crystallization conditions was carried out in plastic LCP sandwich trays (Laminex) using a LCP Mosquito crystallization robot (TTP Labtech); 100 nL LCP was dispensed into each well, then 1 µL precipitant solution was dispensed.

The conditions yielding the structure described in this paper are as follows:

LCP: 30 mg monoolein,  $1.6 \times 10^{-6}$  moles M2(22-46) S31N monomer, and  $1.6 \times 10^{-6}$  moles of compound WJ352 (drug:tetramer ratio of 4:1), mixed with 20 µL of 50 mM MNG-3-C8 detergent in water.

Precipitant solution: 0.2 M NaCl, 0.05 M calcium acetate pH 5.0, 29% v/v PEG 400.

Note that the M2(22-46) S31N peptide was reconstituted in the presence of an inhibiting compound M2WJ352. However, no density corresponding to this inhibitor can be seen in the M2 pore in either conformational state.

Crystals grew as thin, square plates up to 100 µm in size along the longest edge. Single crystals were harvested from the cubic phase using MiTeGen litholoops and frozen in liquid nitrogen for transport and data collection. Crystals diffracted to 2.06 Å resolution and belonged to the P2<sub>1</sub> space group, with unit cell dimensions a, b, c (Å) = 36.29, 36.15, 76.45; α, β, γ (°) = 90, 103.6, 90. Data was collected at Advanced Light Source beam 8.3.1 using a Dectris Pilatus3 S 6M detector and the following data collection protocol: 360 frames of data; detector distance = 250 mm; oscillation = 1°; exposure time = 0.75 s; E = 11.111 keV.

Data processing was carried out in Mosflm.<sup>6</sup> Space group determination was complicated by the presence of a high degree of noncrystallographic symmetry, as well as streaking of spots along the c axis. Scaling and merging were carried out in Aimless.<sup>7</sup> Phasing was carried out using Phaser-MR<sup>8</sup> in the Phenix suite using PDB code 3LBW<sup>9</sup> as the starting model for the Inward<sub>closed</sub> conformation and 5JOO<sup>10</sup> as

the starting model for the Inward<sub>open</sub> conformation. Refinement was done in Phenix,<sup>11</sup> with adjustment of the model to fit the electron density in Coot<sup>12</sup> and PyMOL.<sup>13</sup>

### **NMR spectroscopy:**

Both M2(19-49) WT and M2(19-49) S31N were doubly labeled with <sup>15</sup>N and <sup>13</sup>C. All spectra were recorded at 313 K on a Varian 600 MHz, a Bruker 600 MHz, or a Bruker 900 MHz spectrometer, all equipped with a cryogenic probe. Both M2(19-49) WT and M2(19-49) S31N were solubilized in detergent C<sub>14</sub>-betaine, 50mM NaPi with a monomer concentration of 2mM. pH was adjusted between 3.3 to 9.0 with 0.1M or 1M HCL and NaOH. The 2D <sup>13</sup>C- or <sup>15</sup>N-HSQC spectra were recorded with standard pulse sequences<sup>14</sup> with 8~64 scans,  $t_{2,max} = 142$  ms and  $t_{1,max} = 9$  ms for <sup>13</sup>C-HSQC or  $t_{1,max} = 80$  ms for <sup>15</sup>N-HSQC.<sup>1</sup>H chemical shifts were referenced with respect to residual water peak at 4.63 ppm and <sup>13</sup>C and <sup>15</sup>N chemical shifts were referenced indirectly via gyromagnetic ratios. All spectra were processed and analyzed using the programs nmrPipe.<sup>15</sup> The indirect time domain data of <sup>13</sup>C and <sup>15</sup>N dimensions were used to extend time domain data points by linear prediction. Prior to FT, time domain data were multiplied by sine square bell window functions shifted by 90 ° and zero-filled once.

### **Inward<sub>closed</sub> Asn31 sidechain motif search:**

The protein database was assembled from a RCSB search filtered by the following criteria:

Chain Type: there is a Protein chain but not any DNA or RNA or Hybrid  
Sequence Length is between 40 and 500  
Resolution is between 0.0 and 2.5  
Experimental Method is X-RAY  
XrayRefinementQuery: refine.ls\_R\_factor\_obs.comparator=between  
refine.ls\_R\_factor\_obs.min=0 refine.ls\_R\_factor\_obs.max=0.3  
Representative Structures at 50% Sequence Identity

Structural redundancy was removed from the database with the “nr” option in the program createPDS.<sup>16</sup>

(1) Thomaston, J. L.; Alfonso-Prieto, M.; Woldeyes, R. A.; Fraser, J. S.; Klein, M. L.; Fiorin, G.; DeGrado, W. F., High-resolution structures of the M2 channel from influenza A virus reveal dynamic pathways for proton stabilization and transduction. *Proc. of Natl. Acad. Sci.* **2015**, *112* (46), 14260-14265.

(2) Thomaston, J. L.; DeGrado, W. F., Crystal structure of the drug-resistant S31N influenza M2 proton channel. *Protein Sci.* **2016**, *25* (8), 1551-1554.

(3) Caffrey, M.; Cherezov, V., Crystallizing membrane proteins using lipidic mesophases. *Nat. Protoc.* **2009**, *4* (5), 706-731.

(4) Chae, P. S.; Rasmussen, S. G. F.; Rana, R.; Gotfryd, K.; Chandra, R.; Goren, M. A.; Kruse, A. C.; Nurva, S.; Loland, C. J.; Pierre, Y.; Drew, D.; Popot, J.-L.; Picot, D.; Fox,



- B. G.; Guan, L.; Gether, U.; Byrne, B.; Kobilka, B.; Gellman, S. H., Maltose-neopentyl glycol (MNG) amphiphiles for solubilization, stabilization and crystallization of membrane proteins. *Nat. Methods* **2010**, *7* (12), 1003-1008.
- (5) Cho, K. H.; Husri, M.; Amin, A.; Gotfryd, K.; Lee, H. J.; Go, J.; Kim, J. W.; Loland, C. J.; Guan, L.; Byrne, B.; Chae, P. S., Maltose Neopentyl Glycol-3 (MNG-3) Analogues for Membrane Protein Study. *Analyst* **2015**, *140* (9), 3157-3163.
- (6) Battye, T. G. G.; Kontogiannis, L.; Johnson, O.; Powell, H. R.; Leslie, A. G. W., iMOSFLM: a new graphical interface for diffraction-image processing with MOSFLM. *Acta Cryst. D* **2011**, *67*, 271-281.
- (7) Winn, M. D.; Ballard, C. C.; Cowtan, K. D.; Dodson, E. J.; Emsley, P.; Evans, P. R.; Keegan, R. M.; Krissinel, E. B.; Leslie, A. G. W.; McCoy, A.; McNicholas, S. J.; Murshudov, G. N.; Pannu, N. S.; Potterton, E. A.; Powell, H. R.; Read, R. J.; Vagin, A.; Wilson, K. S., Overview of the CCP4 suite and current developments. *Acta Cryst. D* **2011**, *67*, 235-242.
- (8) McCoy, A. J.; Grosse-Kunstleve, R. W.; Adams, P. D.; Winn, M. D.; Storoni, L. C.; Read, R. J., Phaser crystallographic software. *J. Appl. Crystallogr.* **2007**, *40*, 658-674.
- (9) Acharya, R.; Carnevale, V.; Fiorin, G.; Levine, B. G.; Polishchuk, A. L.; Balannik, V.; Samish, I.; Lamb, R. A.; Pinto, L. H.; DeGrado, W. F.; Klein, M. L., Structure and mechanism of proton transport through the transmembrane tetrameric M2 protein bundle of the influenza A virus. *Proc. Natl. Acad. Sci.* **2010**, *107* (34), 15075-80.
- (10) Thomaston, J. L.; Woldeyes, R. A.; Nakane, T.; Yamashita, A.; Tanaka, T.; Koiwai, K.; Brewster, A. S.; Barad, B. A.; Chen, Y.; Lemmin, T.; Uervirojnangkoorn, M.; Arima, T.; Kobayashi, J.; Masuda, T.; Suzuki, M.; Sugahara, M.; Sauter, N. K.; Tanaka, R.; Nureki, O.; Tono, K.; Joti, Y.; Nango, E.; Iwata, S.; Yumoto, F.; Fraser, J. S.; DeGrado, W. F., XFEL structures of the influenza M2 proton channel: Room temperature water networks and insights into proton conduction. *Proc. Natl. Acad. Sci.* **2017**, *114* (51), 13357-13362.
- (11) Adams, P. D.; Afonine, P. V.; Bunkoczi, G.; Chen, V. B.; Davis, I. W.; Echols, N.; Headd, J. J.; Hung, L. W.; Kapral, G. J.; Grosse-Kunstleve, R. W.; McCoy, A. J.; Moriarty, N. W.; Oeffner, R.; Read, R. J.; Richardson, D. C.; Richardson, J. S.; Terwilliger, T. C.; Zwart, P. H., PHENIX: a comprehensive Python-based system for macromolecular structure solution. *Acta Cryst. D* **2010**, *66*, 213-221.
- (12) Emsley, P.; Lohkamp, B.; Scott, W. G.; Cowtan, K., Features and development of Coot. *Acta Cryst. D* **2010**, *66*, 486-501.
- (13) Schrodinger, LLC, The PyMOL Molecular Graphics System, Version 1.3r1. 2010.
- (14) Sattler, M.; Schleucher, J.; Griesinger, C., Heteronuclear multidimensional NMR experiments for the structure determination of proteins in solution employing pulsed field gradients. *Prog. Nucl. Magn. Reson. Spectrosc.* **1999**, *34* (2), 93-158.
- (15) Delaglio, F.; Grzesiek, S.; Vuister, G. W.; Zhu, G.; Pfeifer, J.; Bax, A., NMRPipe: a multidimensional spectral processing system based on UNIX pipes. *J. Biomol. NMR* **1995**, *6* (3), 277-93.
- (16) Zhou, J.; Grigoryan, G., Rapid search for tertiary fragments reveals protein sequence-structure relationships. *Protein Sci.* **2015**, *24* (4), 508-524.
